# Supplementary material for: Integrated experimental and modeling evaluation of removal efficiency and energy consumption for an autotrophic denitrifying biocathode
Source: Royal Society of Chemistry journal article supplement (doi:10.1039/d2ew00165a), 2022-01-01
Supplement: d2ew00165a1.pdf [file d2ew00165a1.pdf]

## Supporting Information

# Integrated Experimental and Modeling Evaluation of Removal Efficiency and Energy Consumption for an Autotrophic Denitrifying Biocathode

Daniele Ceconet<sup>1,2\*</sup>, Fabrizio Sabba<sup>3,4</sup>, Valentina Anastasi<sup>1</sup>, Silvia Bolognesi<sup>1,5</sup>, Arianna Callegari<sup>1</sup>, Zhen He<sup>6</sup>, Andrea G. Capodaglio<sup>1</sup>

<sup>1</sup>Department of Civil Engineering and Architecture, University of Pavia, Via Adolfo Ferrata 3, 27100 Pavia, Italy

<sup>2</sup>Department of Chemistry, University of Pavia, Via Torquato Taramelli 12, 27100 Pavia, Italy

<sup>3</sup>Black & Veatch, KS, USA

<sup>4</sup>Department of Civil and Environmental Engineering, Northwestern University, 2145 Sheridan Road, Evanston, IL 60208, USA

<sup>5</sup>LEQUIA, Institute of the Environment, University of Girona, Campus Montilivi, Carrer Maria Aurelia Capmany, 69, 17003, Girona, Spain

<sup>6</sup>Department of Energy, Environmental and Chemical Engineering, Washington University in St. Louis, St. Louis, MO 63130, USA

\*Correspondence: [daniele.ceconet@unipv.it](mailto:daniele.ceconet@unipv.it), +39 0382 985764

**\*Corresponding author:**

Daniele Ceconet, Phone: +39 0382 985762; e-mail: [daniele.ceconet@unipv.it](mailto:daniele.ceconet@unipv.it)

**The following are included as supporting information for this paper:**

Number of pages: 3

Number of figures: 2

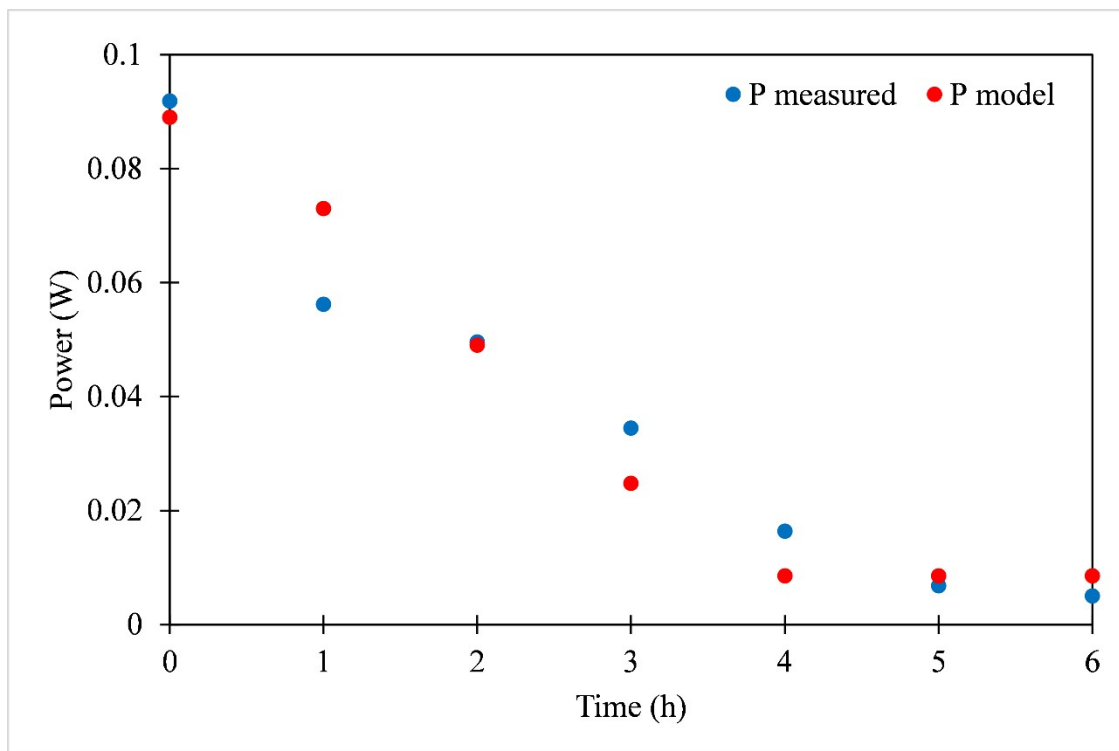

**Figure S1.** Comparison of measured and modelled power demand of the BES during the calibration batch.

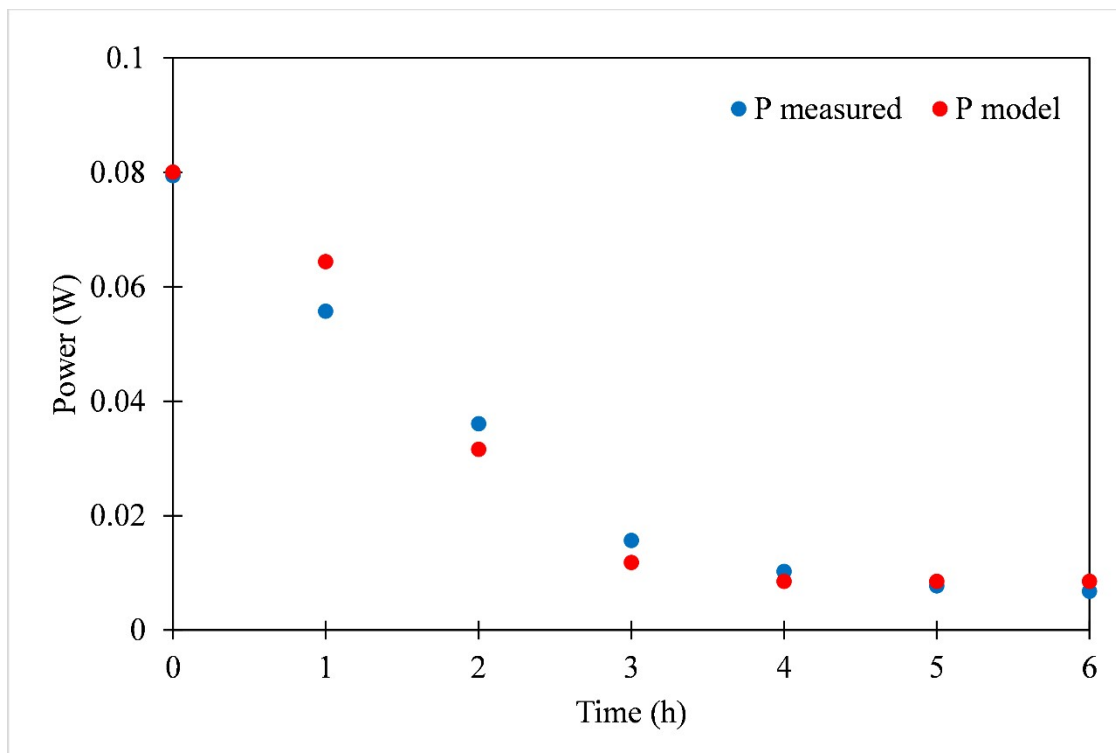

**Figure S2.** Comparison of measured and modelled power demand of the BES during the validation batch.
